# Supplementary material for: FOXF1 mediates mesenchymal stem cell fusion-induced reprogramming of lung cancer cells
Source: PubMed Central journal article supplement (PMC4253450; doi:10.18632/oncotarget.2413), 2014-09-09
Supplement: oncotarget-05-9514-s001.pdf [file oncotarget-05-9514-s001.pdf]

## SUPPLEMENTARY FIGURES AND TABLES

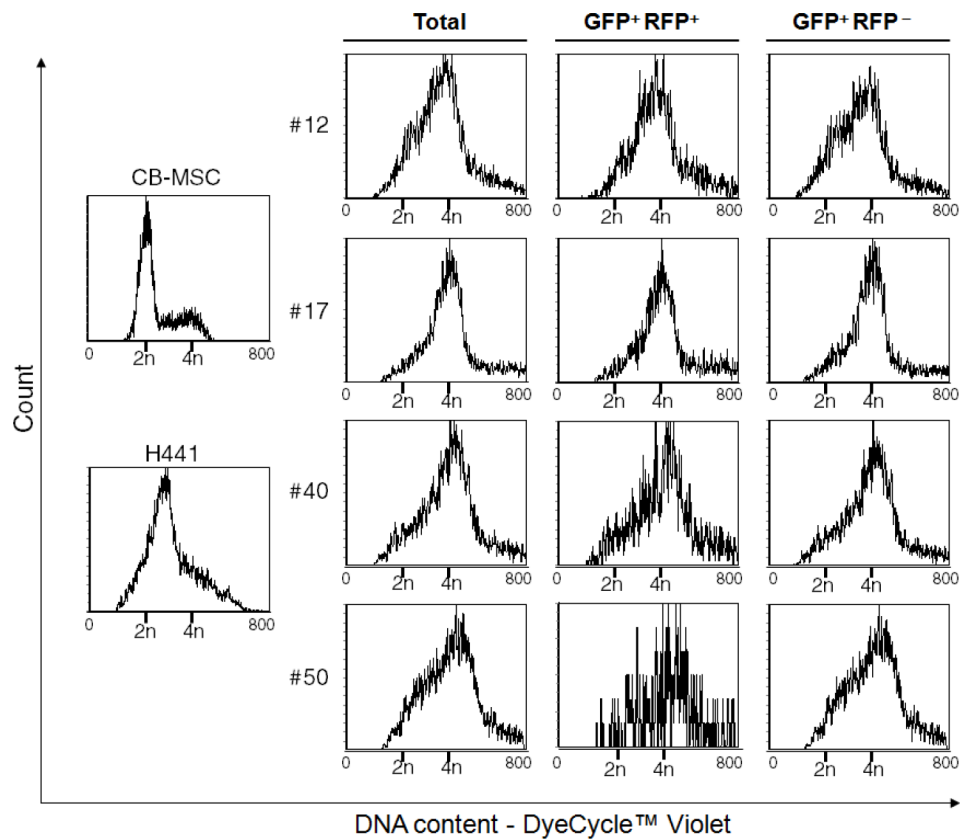

**Supplementary Figure S1: DNA content in distinct fluorescent cell populations of fusion progeny.** The DNA content of fusion progeny and parental cells were analyzed by DNA staining with Dye-Cycle Violet and flow cytometry. DNA content of GFP+/RFP+ and GFP+/RFP- populations of fusion progeny had nearly identical DNA content, and DNA content of all fusion progeny was >2-fold higher than parental MSCs. Parental MSC are diploid control ( $n$  = haploid chromosome number of CB-MS).

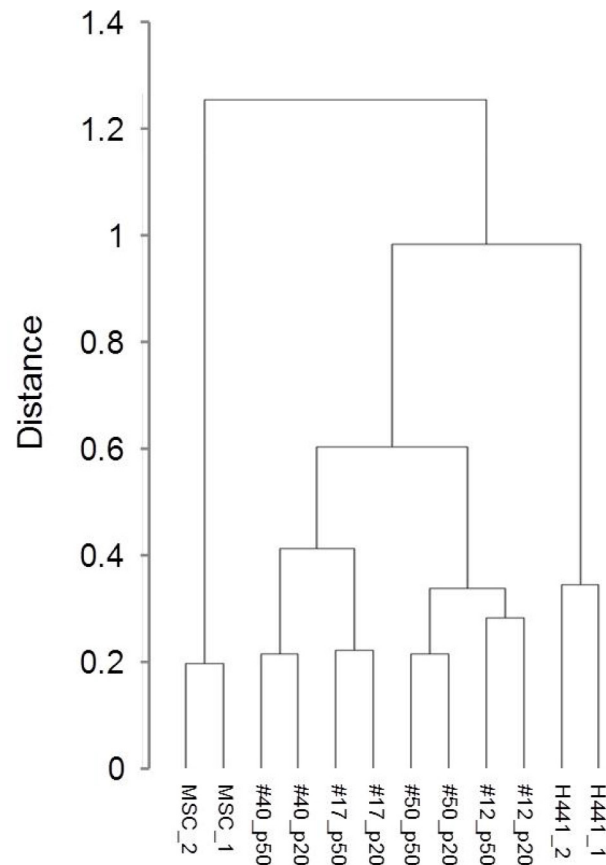

**Supplementary Figure S2: Hierarchical clustering dendrogram of the transcriptomes of fusion progeny and parental fusion partners.** Based on present/absent signals, we found 26,087 transcripts found in fusion progeny and their parental partners with at least one significant expression (detection p-value < 0.05). RNA was extracted from two independent cultures of each parental cell line (H441\_1, H441\_2 and MSC\_1, MSC\_2) and passages 20 and 50 of each fusion progeny. Pearson's correlation distance was used as the metric to create the transcriptional profile dendrogram.

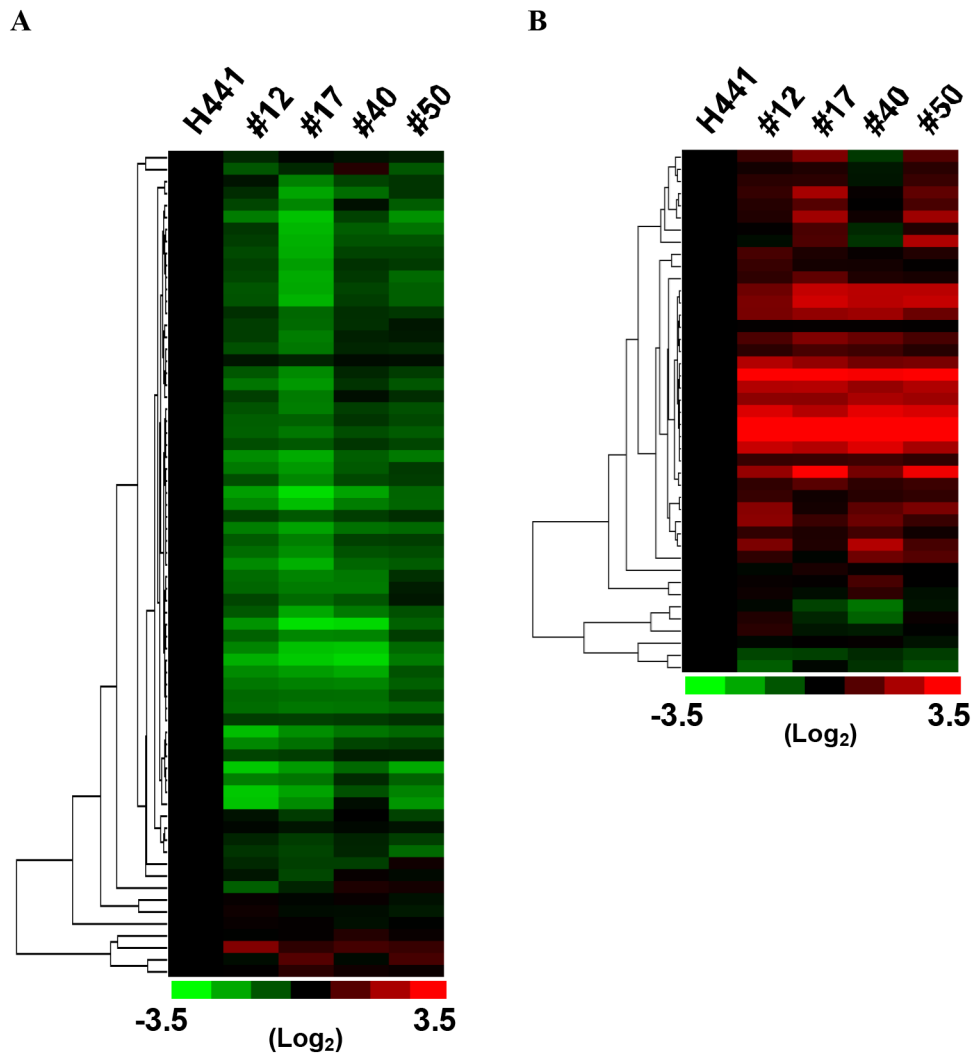

**Supplementary Figure S3: Heatmap of p21-regulated genes.** From a list of seventy-four p21-inhibited genes and forty-eight p21-induced genes, which were previously identified by Chang et al [1], we found (A) sixty-nine p21-inhibited genes and (B) forty-three p21-induced genes in our microarray analysis were expressed at a detectable level in fusion progeny and parental cells. Values indicate the log<sub>2</sub> fold change of gene expression in four fusion progeny relative to H441 cells.

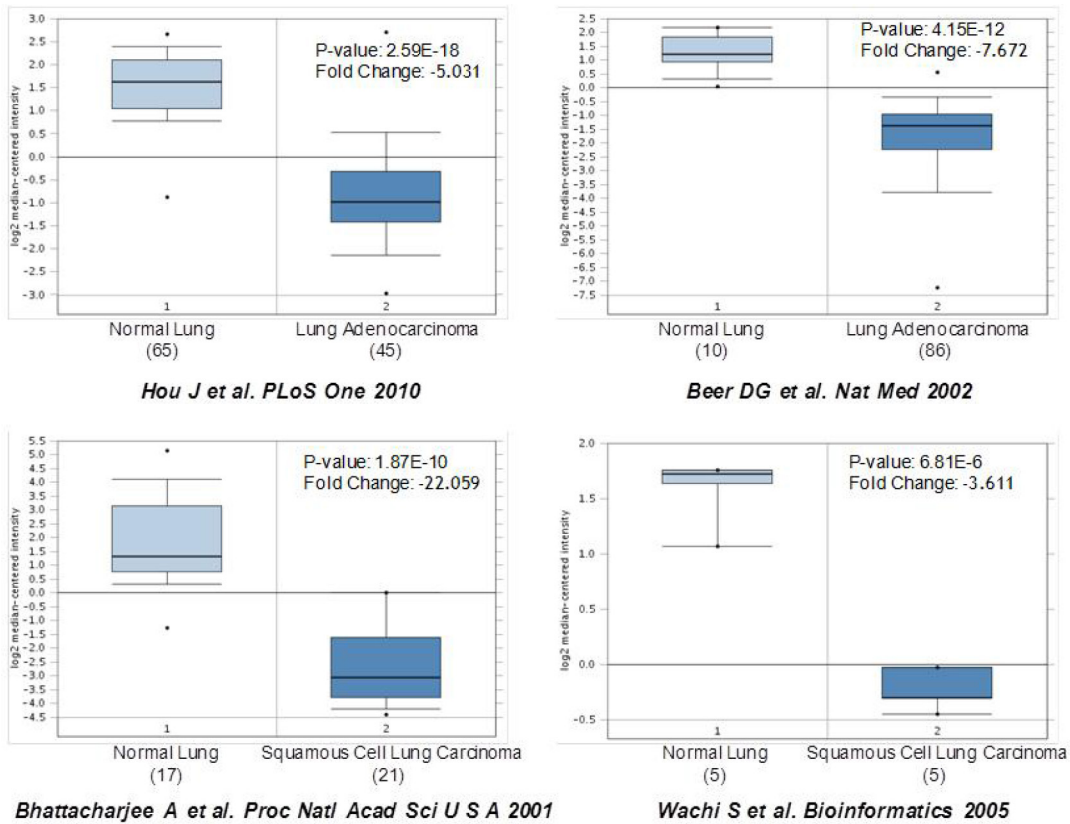

**Supplementary Figure S4: *In silico* analysis of FOXF1 expression.** We performed *in silico* analysis of FOXF1 expression using OncoPrint Research Edition (<https://www.oncoprint.org/>). FOXF1 mRNA expression was queried in cancer vs. normal in the lung cancer category. The query threshold was set at a p-value <10<sup>-4</sup>, over two-fold difference of expression, and top 10% ranking in under-expression genes. We found four analyses from four studies met these criteria.[2–5] FOXF1 mRNA expression in normal and malignant lung specimens are presented as box and whisker plots. Sample numbers, fold changes, and P values for FOXF1 expression between normal and malignant specimens are indicated.

**Supplementary Table S1. Genes showing consistent differential expression in fusion progeny versus parental cells**

| TargetID  | SOURCE_REFERENCE_ID | ProbeID | Average Signal |            |         |         |         |         | Signal Ratio Relative to H441 |       |       |       |       |
|-----------|---------------------|---------|----------------|------------|---------|---------|---------|---------|-------------------------------|-------|-------|-------|-------|
|           |                     |         | H441           | CB-<br>MSC | #12     | #17     | #40     | #50     | CB-<br>MSC                    | #12   | #17   | #40   | #50   |
| CHN1      | NM_001025201.1      | 610332  | 215.82         | 211.54     | 536.36  | 834.76  | 750.03  | 495.26  | 0.98                          | 2.49  | 3.87  | 3.48  | 2.29  |
| FOXF1     | NM_001451.2         | 3800554 | 115.20         | 126.11     | 1687.40 | 872.02  | 1051.02 | 1086.15 | 1.09                          | 14.65 | 7.57  | 9.12  | 9.43  |
| HS.537002 | Hs.537002           | 2750202 | 156.56         | 162.32     | 924.71  | 416.65  | 734.94  | 517.27  | 1.04                          | 5.91  | 2.66  | 4.69  | 3.30  |
| IGFN1     | NM_178275.4         | 840128  | 121.06         | 120.38     | 406.18  | 328.99  | 288.31  | 653.41  | 0.99                          | 3.36  | 2.72  | 2.38  | 5.40  |
| LOC652683 | XM_942283.2         | 3800692 | 142.23         | 138.70     | 3413.31 | 3888.32 | 379.18  | 2382.76 | 0.98                          | 24.00 | 27.34 | 2.67  | 16.75 |
| LOC653071 | XM_930721.1         | 6760343 | 141.08         | 141.72     | 635.27  | 413.68  | 466.02  | 719.68  | 1.00                          | 4.50  | 2.93  | 3.30  | 5.10  |
| NPC1      | NM_000271.3         | 7570358 | 594.92         | 615.70     | 1667.17 | 1295.71 | 2159.39 | 1328.40 | 1.03                          | 2.80  | 2.18  | 3.63  | 2.23  |
| PLAC8     | NM_016619.1         | 4830113 | 253.27         | 247.88     | 1839.59 | 1873.64 | 1261.08 | 2659.26 | 0.98                          | 7.26  | 7.40  | 4.98  | 10.50 |
| PSG4      | NM_002780.3         | 3400474 | 140.00         | 144.07     | 1013.37 | 501.48  | 2573.65 | 1076.95 | 1.03                          | 7.24  | 3.58  | 18.38 | 7.69  |
| PSG9      | NM_002784.2         | 4120243 | 116.29         | 122.03     | 1051.33 | 454.58  | 3344.36 | 910.10  | 1.05                          | 9.04  | 3.91  | 28.76 | 7.83  |
| SFRP1     | NM_003012.3         | 6960379 | 147.00         | 149.80     | 366.39  | 573.08  | 523.34  | 755.09  | 1.02                          | 2.49  | 3.90  | 3.56  | 5.14  |
| SPANXA2   | NM_145662.2         | 6960653 | 160.95         | 153.91     | 3231.63 | 4295.63 | 408.10  | 2078.12 | 0.96                          | 20.08 | 26.69 | 2.54  | 12.91 |
| SPANXB2   | NM_145664.1         | 7330280 | 128.51         | 123.64     | 3229.78 | 3962.10 | 324.25  | 2021.64 | 0.96                          | 25.13 | 30.83 | 2.52  | 15.73 |

Thirteen genes were consistently under- or over-expressed in fusion progeny relative to parental cell lines. For these genes, expression ratios of CB-MSC relative to H441 were between 0.95-fold and 1.05-fold. For fusion progeny all ratios were >2.

**Supplementary Table S2. Summary of genes regulated by p21**

| ENTREZ<br>GENE_ID   | TargetID | Fold change relative to H441 (log2) |       |       |       |
|---------------------|----------|-------------------------------------|-------|-------|-------|
|                     |          | #12                                 | #17   | #40   | #50   |
| p21-inhibited genes |          |                                     |       |       |       |
| 983                 | CDC2     | -1.04                               | -2.00 | -1.44 | -0.95 |
| 1163                | CKS1B    | -2.07                               | -2.40 | -2.55 | -1.45 |
| 5347                | PLK1     | -1.14                               | -1.41 | -0.92 | -1.08 |
| 23397               | NCAPH    | -0.48                               | -0.07 | -0.22 | -0.35 |
| 1058                | CENPA    | -1.11                               | -1.15 | -0.62 | -0.85 |
| 1063                | CENPF    | -0.72                               | -1.26 | -0.56 | -0.27 |
| 4085                | MAD2L1   | -1.87                               | -2.61 | -1.95 | -1.18 |
| 701                 | BUB1B    | -0.98                               | -1.50 | -0.74 | -0.94 |
| 11004               | KIF2C    | -0.96                               | -1.41 | -0.44 | -0.50 |
| 3833                | KIFC1    | -0.87                               | -2.04 | -0.80 | -0.79 |
| 1653                | DDX1     | -0.22                               | -0.71 | 0.00  | -0.78 |
| 6790                | AURKA    | -0.82                               | -1.59 | -0.20 | -1.09 |
| 9212                | AURKB    | -2.37                               | -1.84 | -1.23 | -2.00 |
| 23082               | PPRC1    | -0.91                               | -1.05 | -0.63 | -0.82 |
| 11113               | CIT      | -0.25                               | -0.42 | -0.13 | -0.17 |
| 4001                | LMNB1    | -1.43                               | -1.81 | -1.06 | -0.67 |
| 84823               | LMNB2    | -0.23                               | -1.53 | -0.80 | -0.61 |
| 7112                | TMPO     | -0.84                               | -2.02 | -0.67 | -1.24 |
| 2305                | FOXM1    | -0.65                               | -2.17 | -1.10 | -1.36 |
| 7083                | TK1      | -0.76                               | -1.87 | -0.58 | -0.69 |
| 7298                | TYMS     | -1.04                               | -1.63 | -0.45 | -0.71 |
| 7378                | UPP1     | -0.03                               | 0.06  | 0.42  | 0.11  |
| 6240                | RRM1     | -0.72                               | -1.48 | -0.39 | -0.30 |
| 6241                | RRM2     | -1.47                               | -2.30 | -0.78 | -1.74 |
| 4176                | MCM7     | -1.61                               | -1.32 | -0.80 | -0.73 |
| 4173                | MCM4     | -1.61                               | -2.25 | -1.49 | -1.20 |
| 8318                | CDC45L   | -1.75                               | -2.65 | -2.55 | -1.15 |
| 4998                | ORC1L    | -1.29                               | -1.68 | -0.97 | -0.90 |
| 5422                | POLA1    | -0.93                               | -1.60 | -0.86 | -0.72 |
| 5984                | RFC4     | -1.27                               | -1.57 | -1.43 | -0.58 |
| 4605                | MYBL2    | 0.09                                | -0.06 | 0.10  | -0.20 |
| 9319                | TRIP13   | -1.01                               | -1.99 | -0.81 | -1.13 |
| 7153                | TOP2A    | -0.72                               | -2.09 | -0.99 | -0.99 |
| 8208                | CHAF1B   | -0.48                               | -0.75 | -0.75 | 0.19  |

| ENTREZ<br>GENE_ID | TargetID | Fold change relative to H441 (log2) |       |       |       |
|-------------------|----------|-------------------------------------|-------|-------|-------|
|                   |          | #12                                 | #17   | #40   | #50   |
| 3146              | HMGB1    | -1.29                               | -1.41 | -1.38 | -1.24 |
| 3148              | HMGB2    | -1.21                               | -1.45 | -1.46 | -0.33 |
| 2189              | FANCG    | -2.25                               | -1.68 | -1.39 | -1.22 |
| 8438              | RAD54L   | -0.82                               | -1.26 | -1.01 | -0.28 |
| 9156              | EXO1     | -1.64                               | -1.84 | -2.01 | -0.97 |
| 3978              | LIG1     | -0.53                               | -1.95 | -1.28 | -0.62 |
| 5885              | RAD21    | -0.99                               | -2.11 | -0.73 | -1.13 |
| 10915             | TCERG1   | -0.56                               | -1.22 | -0.55 | -0.66 |
| 10189             | THOC4    | -1.50                               | -1.93 | -1.34 | -1.23 |
| 10322             | SMYD5    | -0.08                               | -0.24 | -0.10 | -0.22 |
| 2146              | EZH2     | -1.07                               | -1.50 | -0.76 | -0.73 |
| 6421              | SFPQ     | 0.18                                | -0.14 | -0.15 | -0.30 |
| 3184              | HNRNPD   | -0.76                               | -1.05 | -0.72 | -0.54 |
| 10465             | PPIH     | -1.42                               | -1.53 | -1.58 | -1.12 |
| 26227             | PHGDH    | -1.13                               | -0.41 | 0.35  | 0.24  |
| 8140              | SLC7A5   | -2.32                               | -1.65 | -0.16 | -1.77 |
| 3161              | HMMR     | -0.25                               | -0.84 | 0.09  | -0.11 |
| 9787              | DLG7     | -0.74                               | -1.46 | -0.18 | -0.53 |
| 10293             | TRAIP    | -0.73                               | -0.76 | -0.70 | -0.58 |
| 10797             | MTHFD2   | -1.24                               | -1.30 | -1.30 | -0.84 |
| 6520              | SLC3A2   | -1.03                               | -0.48 | 0.44  | -1.02 |
| 9656              | MDC1     | -1.50                               | -1.38 | -0.49 | -1.17 |
| 27346             | TMEM97   | -1.15                               | -1.60 | -1.56 | -0.72 |
| 5612              | PRKRIR   | 0.10                                | 0.06  | -0.18 | -0.03 |
| 2542              | SLC37A4  | -0.14                               | 0.99  | -0.12 | 0.83  |
| 27101             | CACYBP   | -2.37                               | -1.93 | -0.95 | -1.55 |
| 4953              | ODC1     | -0.62                               | -0.81 | -0.45 | -1.26 |
| 10024             | TROAP    | -1.38                               | -1.80 | -0.61 | -1.02 |
| 6646              | SOAT1    | -0.43                               | -0.71 | -0.42 | -0.74 |
| 5411              | PNN      | -0.81                               | -0.73 | -0.37 | -0.39 |
| 890               | CCNA2    | -1.64                               | -2.09 | -1.21 | -1.09 |
| 891               | CCNB1    | -1.67                               | -2.03 | -1.12 | -1.44 |
| 993               | CDC25A   | -1.56                               | -2.28 | -2.34 | -1.25 |
| 3621              | ING1     | 0.03                                | 0.50  | 0.20  | 0.13  |
| 5420              | PODXL    | 1.54                                | 0.54  | 0.80  | 0.66  |

| ENTREZ<br>GENE_ID | TargetID | Fold change relative to H441 (log2) |       |       |       |
|-------------------|----------|-------------------------------------|-------|-------|-------|
|                   |          | #12                                 | #17   | #40   | #50   |
| p21-induced genes |          |                                     |       |       |       |
| 5054              | SERPINE1 | 1.87                                | 0.28  | 1.27  | 1.69  |
| 5327              | PLAT     | 1.72                                | 0.43  | 2.47  | 0.97  |
| 3913              | LAMB2    | 2.46                                | 2.50  | 2.05  | 2.42  |
| 1824              | DSC2     | -1.30                               | -0.10 | -0.70 | -1.09 |
| 3958              | LGALS3   | 0.05                                | 1.01  | -0.56 | 0.47  |
| 3959              | LGALS3BP | 0.18                                | -0.19 | 0.65  | -0.21 |
| 5660              | PSAP     | 0.60                                | 0.99  | 0.86  | 0.52  |
| 1490              | CTGF     | 5.57                                | 4.79  | 5.42  | 4.86  |
| 2896              | GRN      | 0.67                                | 1.22  | 0.63  | 0.82  |
| 4820              | NKTR     | 0.75                                | 0.79  | 0.87  | 0.66  |
| 7052              | TGM2     | 0.57                                | -0.31 | -0.38 | -0.03 |
| 10234             | LRRC17   | 2.75                                | 2.48  | 3.06  | 2.28  |
| 6289              | SAA2     | -0.18                               | 1.06  | -0.71 | 2.42  |
| 351               | APP      | 0.64                                | -0.06 | 1.53  | 1.16  |
| 718               | C3       | 0.57                                | 0.61  | -0.29 | 0.77  |
| 6695              | SPOCK1   | 4.07                                | 4.65  | 4.33  | 3.85  |
| 3690              | ITGB3    | 0.11                                | 0.06  | 0.98  | 0.03  |
| 2588              | GALNS    | -0.11                               | 0.36  | 0.11  | 0.03  |
| 2548              | GAA      | 0.45                                | -0.52 | -1.36 | 0.14  |
| 3988              | LIPA     | 0.67                                | 0.41  | 0.91  | 0.22  |
| 1200              | TPP1     | 1.93                                | 1.93  | 2.35  | 2.17  |
| 6648              | SOD2     | 0.45                                | 2.21  | 0.22  | 2.19  |
| 2630              | GBAP     | 0.06                                | 0.07  | 0.08  | 0.04  |
| 1666              | DECR1    | 0.65                                | 1.32  | 0.43  | 0.32  |
| 9246              | UBE2L6   | 0.51                                | 1.16  | 0.02  | 1.00  |
| 9101              | USP8     | -0.09                               | 0.03  | 0.07  | -0.25 |
| 10397             | NDRG1    | -0.96                               | -0.89 | -0.57 | -0.85 |
| 27063             | ANKRD1   | 5.22                                | 3.79  | 3.41  | 4.12  |
| 9961              | MVP      | 3.02                                | 2.48  | 3.17  | 2.98  |
| 10628             | TXNIP    | 0.72                                | 2.29  | 0.10  | 1.32  |
| 6237              | RRAS     | 1.69                                | 2.87  | 2.55  | 2.72  |
| 5872              | RAB13    | 0.26                                | 0.44  | -0.33 | 0.57  |
| 6464              | SHC1     | 1.92                                | 0.79  | 1.47  | 0.77  |
| 27250             | PDCD4    | 0.76                                | 0.28  | 0.27  | 0.05  |
| 9235              | IL32     | 2.06                                | 3.59  | 1.61  | 3.32  |



| ENTREZ<br>GENE_ID | TargetID   | Fold change relative to H441 (log2) |       |       |       |
|-------------------|------------|-------------------------------------|-------|-------|-------|
|                   |            | #12                                 | #17   | #40   | #50   |
| 7294              | TXK        | 0.75                                | 0.23  | 0.55  | 0.67  |
| 6567              | SLC16A2    | 1.04                                | 1.77  | 1.44  | 0.98  |
| 10133             | OPTN       | 1.51                                | 2.69  | 2.56  | 2.55  |
| 1774              | DNASE1L1   | 2.46                                | 2.03  | 1.57  | 1.67  |
| 4779              | NFE2L1     | 0.98                                | 0.39  | 0.11  | 0.46  |
| 8337              | HIST2H2AA3 | 0.77                                | 1.74  | -0.78 | 1.15  |
| 8349              | HIST2H2BE  | 1.66                                | 2.02  | 2.17  | 1.47  |
| 51651             | PTRH2      | -0.11                               | -0.92 | -1.61 | -0.26 |

The list of p21-regulated genes was identified by Chang et al., 2000.

**SUPPLEMENTARY REFERENCES**

1. Chang BD, Watanabe K, Broude EV, Fang J, Poole JC, Kalinichenko TV and Roninson IB. Effects of p21Waf1/Cip1/Sdi1 on cellular gene expression: implications for carcinogenesis, senescence, and age-related diseases. *Proc Natl Acad Sci U S A*. 2000; 97(8):4291–4296.
2. Bhattacharjee A, Richards WG, Staunton J, Li C, Monti S, Vasa P, Ladd C, Beheshti J, Bueno R, Gillette M, Loda M, Weber G, Mark EJ, Lander ES, Wong W and Johnson BE. Classification of human lung carcinomas by mRNA expression profiling reveals distinct adenocarcinoma subclasses. *Proc Natl Acad Sci U S A*. 2001; 98(24): 13790–13795.
3. Wachi S, Yoneda K and Wu R. Interactome-transcriptome analysis reveals the high centrality of genes differentially expressed in lung cancer tissues. *Bioinformatics*. 2005; 21(23):4205–4208.
4. Beer DG, Kardia SL, Huang CC, Giordano TJ, Levin AM, Misek DE, Lin L, Chen G, Gharib TG, Thomas DG, Lizyness ML, Kuick R, Hayasaka S, Taylor JM, Iannettoni MD and Orringer MB. Gene-expression profiles predict survival of patients with lung adenocarcinoma. *Nat Med*. 2002; 8(8):816–824.
5. Hou J, Aerts J, den Hamer B, van Ijcken W, den Bakker M, Riegman P, van der Leest C, van der Spek P, Foekens JA, Hoogsteden HC, Grosveld F and Philipsen S. Gene expression-based classification of non-small cell lung carcinomas and survival prediction. *PLoS One*. 2010; 5(4):e10312.
